# Supplementary material
Source: HighWire-hosted journal article supplement (https://www.genetics.org/content/suppl/2011/09/27/genetics.111.133967)

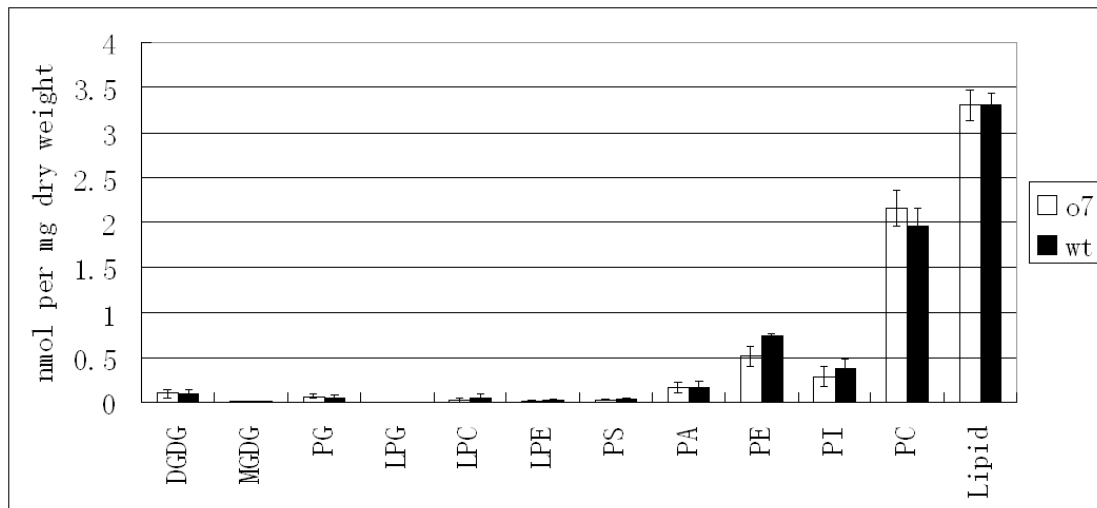

**Figure S2** The comparison of fatty acids and total lipid accumulation in wt and o7 kernels.

Supplement: FigureS2.pdf [file FigureS2.pdf]
